1 **COVID-19 screening strategies that permit**

2 **the safe re-opening of college campuses**

3  
4 A. David Paltiel, PhD

5 Amy Zheng, BA

6 Rochelle P. Walensky, MD, MPH

7 **Author affiliations:**

8 From the Public Health Modeling Unit, Yale School of Public Health (ADP), New  
9 Haven, CT and the Medical Practice Evaluation Center, Division of Infectious Diseases  
10 (RPW), Massachusetts General Hospital, Boston, MA;, and Harvard Medical School  
11 (AZ, RPW), Boston, MA

12  
13 **Corresponding Author:**

14 A. David Paltiel, PhD  
15 Yale School of Public Health  
16 60 College Street, New Haven CT 06510  
17 (203) 436-4081  
18 [david.paltiel@yale.edu](mailto:david.paltiel@yale.edu)

19  
20 **Word Counts:** Main text: 2,654; Key Points: 80; Abstract: 294

22    **Funding Sources:** This work was supported by awards from the National Institute on  
23    Drug Abuse (R37 DA015612) of the National Institutes of Health and the Massachusetts  
24    General Hospital Executive Committee on Research (Steve and Deborah Gorlin Research  
25    Scholars Award to RPW). The funding sources had no role in the design, analysis, or  
26    interpretation of the study, the writing of the manuscript, or in the decision to submit the  
27    manuscript for publication. The content is solely the responsibility of the authors and  
28    does not necessarily represent the official views of the National Institutes of Health or the  
29    Massachusetts General Hospital Executive Committee on Research.

30 **KEY POINTS**

31

32 **Question:** What SARS-CoV-2 screening and isolation program will keep U.S. residential  
33 college students safe and permit the reopening of campuses?

34

35 **Findings:** Frequent screening (every 2 or 3 days) of all students with a low-sensitivity, high-  
36 specificity test will control outbreaks with manageable isolation dormitory utilization at a  
37 justifiable cost.

38

39 **Meaning:** Campuses can safely reopen in the Fall 2020 but success hinges on frequent screening  
40 and uncompromising, continuous attention to basic prevention and behavioral interventions to  
41 reduce the baseline severity of transmission.

42

43 **ABSTRACT**

44 **Importance:** The COVID-19 pandemic poses an existential threat to many US  
45 residential colleges: either they open their doors to students in September or they risk  
46 serious financial consequences.

47

48 **Objective:** To define SARS-CoV-2 screening performance standards that would permit  
49 the safe return of students to campus for the Fall 2020 semester.

50

51 **Design:** Decision and cost-effectiveness analysis linked to a compartmental epidemic  
52 model to evaluate campus screening using tests of varying frequency (daily-weekly),  
53 sensitivity (70%-99%), specificity (98%-99.7%), and cost (\$10-\$50/test). Reproductive  
54 numbers  $R_t = \{1.5, 2.5, 3.5\}$  defined three epidemic scenarios, with additional infections  
55 imported via exogenous shocks. We generally adhered to US government guidance for  
56 parameterization data.

57

58 **Participants:** A hypothetical cohort of 5000 college-age, uninfected students.

59

60 **Main Outcome(s) and Measure(s):** Cumulative tests, infections, and costs; daily  
61 isolation dormitory census; incremental cost-effectiveness; and budget impact. All  
62 measured over an 80-day, abbreviated semester.

63

64 **Results:** With  $R_t = 2.5$ , daily screening with a 70% sensitive, 98% specific test produces  
65 85 cumulative student infections and isolation dormitory daily census averaging 108  
66 (88% false positives). Screening every 2 (7) days nets 135 (3662) cumulative infections  
67 and daily isolation census 66 (252) with 73% (4%) false positives. Across all scenarios,  
68 test frequency exerts more influence on outcomes than test sensitivity. Cost-effectiveness  
69 analysis selects screening every {2, 1, 7} days with a 70% sensitive test as the preferred  
70 strategy for  $R_t = \{2.5, 3.5, 1.5\}$ , implying a screening cost of {\$470, \$920, \$120} per  
71 student per semester.

72

73 **Conclusions & Relevance:** Rapid, inexpensive and frequently conducted screening –  
74 even if only 70% sensitive – would be cost-effective and produce a modest number of  
75 COVID-19 infections. While the optimal screening frequency hinges on the success of  
76 behavioral interventions to reduce the base severity of transmission ( $R_t$ ), this could permit  
77 the safe return of student to campus.

## 78 INTRODUCTION

79 Universities across the United States are struggling with the question of whether and how  
80 to reopen for the Fall 2020 semester.<sup>1,2</sup> Residential colleges – with their communal living  
81 arrangements, shared dining spaces, intimate classrooms, and a population of young  
82 adults anxious to socialize – pose a particular challenge. In the absence of an effective  
83 vaccine, a proven therapy, and/or sufficient herd immunity, the best hope for re-opening  
84 campuses in the fall is likely to be a robust strategy of behavior-based prevention  
85 combined with regular monitoring to rapidly detect, isolate, and contain new SARS-CoV-  
86 2 infections, when they occur.<sup>3</sup>

87 Evidence on the available monitoring technologies and their performance is limited and  
88 rapidly evolving. The FDA is currently evaluating over 100 candidate tests for the  
89 presence of SARS-CoV-2 infection or antibodies.<sup>4,5</sup> The uncertainties span a broad range,  
90 including the logistics of deployment, the ease and comfort of sample collection, and the  
91 accuracy, scalability, turn-around-time and cost of test kits. After a new COVID-19 case  
92 is detected, further questions emerge regarding how to conduct subsequent tracing, how  
93 to isolate detected cases in the context of congregate housing arrangements, and how to  
94 protect other at-risk populations, including faculty, staff, and members of the surrounding  
95 community.<sup>6</sup> These uncertainties underscore the pressing need for both a generalized  
96 assessment of population-wide screening for SARS-CoV-2 and a comprehensive plan for  
97 university reopening.

98 For many U.S. colleges, COVID-19 poses an existential threat: either they open their  
99 doors to students in September or they suffer severe financial consequences.<sup>7</sup> University

100 administrators struggling with this dilemma must nevertheless keep in mind that their  
101 first priority is the safety of the students in their care. In this paper, we offer specific  
102 recommendations on the design of a virologic monitoring program that will keep students  
103 safe at an affordable cost. Our specific research objectives are: first, to define the  
104 minimum performance attributes of a SARS-CoV-2 monitoring program (e.g., its  
105 frequency, sensitivity, specificity, and cost) that could ensure that college students are  
106 kept safe; second, to understand how those minimum performance standards might  
107 change under varying assumptions about the severity of the epidemic and the success of  
108 behavioral and social distancing interventions; third, to suggest what isolation and  
109 treatment capacity would need to be in place; and finally, to forecast what all this might  
110 cost and to help decision makers make sense of that information to address the question  
111 of a screening and monitoring program's "value."

112

## 113 **METHODS**

### 114 **Study Design**

115 We adapted a simple compartmental epidemic model to capture the essential features of  
116 the situation facing university decision makers: the epidemiology of SARS-CoV-2; the  
117 natural history of COVID-19 illness; and regular mass screening to detect, isolate, and  
118 contain the presence of SARS-CoV-2 in a residential college setting (**Figure S1**). A  
119 spreadsheet implementation of the model permitted us to vary critical epidemic  
120 parameters and to examine how different test performance attributes (frequency,

121 sensitivity, specificity, cost) would translate into outcomes. Model input data (**Table 1**)  
122 were obtained from a variety of published sources, adhering whenever possible to data  
123 guidance for modelers recently issued by the Centers for Disease Control and Prevention  
124 (CDC) and the Office of the Assistant Secretary for Preparedness and Response  
125 (ASPR).<sup>8-18</sup> We defined three increasingly pessimistic epidemic scenarios and estimated  
126 both cumulative outcomes (e.g., tests administered; true/false positives; new infections;  
127 and person-days requiring isolation) and economic performance (e.g., costs, incremental  
128 cost-effectiveness, and budget impact) over an abbreviated 80-day semester, running  
129 from Labor Day through Thanksgiving.<sup>2</sup> We assumed a medium-sized college setting  
130 with a target population of 5000 students, all of them <30 years old and non-immune,  
131 living in a congregate setting.<sup>18,19</sup> We “seeded” this population with 10 undetected,  
132 asymptomatic cases of SARS-CoV-2 infection.

133

### 134 **Compartmental Model**

135 To the basic “susceptible-infected-removed” (or “SIR”) compartmental modeling  
136 framework, we added the following: the availability of regular, repeated screening with a  
137 test of imperfect sensitivity and specificity; creation of a new compartment for uninfected  
138 persons receiving a false positive test result; separation of the infected compartment to  
139 distinguish between undetected asymptomatics, detected asymptomatics (“true  
140 positives”), and observed symptomatics; and the importation of additional new infections  
141 via exogenous shocks (e.g., infections transmitted to students by university employees or  
142 members of the surrounding community; “super-spreader” events such as parties).



143 We defined three epidemic severity scenarios: a “base case” with  $R_t = 2.5$ , a test  
144 specificity of 98%, and the exogenous introduction of five new, undetected infections  
145 into the susceptible population each week; a “worst case” with  $R_t = 3.5$ , a test specificity  
146 of 98%, and 25 exogenous new infections every two weeks; and a “best case” with  $R_t =$   
147 1.5, test specificity 99.7%, and no exogenous shocks.

148

### 149 **Isolation**

150 We assumed that after a lag of 8 hours, individuals receiving a positive test result (true or  
151 false) and those exhibiting symptoms of COVID-19 were moved from the general  
152 population to an “isolation dormitory” where their infection was confirmed, where they  
153 were treated with supportive care, and from which no further transmissions were  
154 possible. The lag reflected both test turnaround delays and the time required to locate and  
155 isolate identified cases. Confirmed (true positive) cases remained in the isolation  
156 dormitory an average of 14 days, to ensure they were not infectious before proceeding to  
157 a recovered/immune state.<sup>9,10</sup> Students with false positive results remained isolated for 24  
158 hours, reflecting our assumption that a highly-specific confirmatory test could overturn  
159 the original diagnosis, permitting them to return to the campus population.

160 We assumed a symptomatic case fatality risk of 0.05% and a 30% probability that  
161 infection would eventually lead to observable COVID-19-defining symptoms in this  
162 young cohort.<sup>8,11-13</sup>

163

164 **Screening**

165 We sought to evaluate both existing SARS-CoV-2 detection methods and newer  
166 technologies that could plausibly be available in the near future. Accordingly, we  
167 considered a range of different test sensitivities (70-99%), specificities (98-99.7%),<sup>16,17</sup>  
168 and per test costs (\$10-\$50). For each combination of these test characteristics, we  
169 considered screening frequencies every 1, 2, 3, and 7 days. We assumed that a  
170 confirmatory test with 100% specificity could distinguish false positive from true positive  
171 results at a cost of \$100.

172

173 **Cost-effectiveness**

174 Next, we estimated incremental cost-effectiveness ratios, denominated in screening costs  
175 per infection averted. This measure of return on investment in screening was compared to  
176 a benchmark of value estimated by multiplying the following four terms: 1) COVID-  
177 related mortality of 0.05% in persons of college age;<sup>8</sup> 2) survival loss of 60 years per  
178 college-age fatality<sup>20</sup> 3) societal willingness-to-pay (WTP) \$100,000 per year of life  
179 gained;<sup>21</sup> and 4)  $(1 + R_t)$ , to account for the fact that each infection averted prevents an  
180 average of  $R_t$  secondary infections.<sup>8,14,15</sup> This method yielded a maximum WTP to avert  
181 one infection ranging from \$7,500 (best case) to \$10,500 (base case) to \$13,500 (worst  
182 case).

183 Cost-effectiveness analysis identified a preferred screening strategy from among 12  
184 possibilities – three test sensitivities (70%, 80%, and 90%) and four frequencies (1, 2, 3,

185 and 7 times per week) – under each of the epidemic scenarios (base, worst, and best case)  
186 described above. To help decision makers understand the fiscal consequences of pursuing  
187 these preferred strategies, we also conducted a budget impact assessment, reporting the  
188 cumulative costs for the semester on a per-student basis.

189

## 190 **RESULTS**

### 191 **Impact of Test Frequency and Sensitivity**

192 Over an 80-day semester, in the base case, daily screening with a 70% sensitive, 98%  
193 specific test will result in 85 cumulative infections. This estimate jumps to 135/234/3,662  
194 when tests are performed every 2/3/7 days. Raising the sensitivity of the test from 70% to  
195 90% will reduce total infections (e.g., from 85 to 77 for daily screening and from 3,662 to  
196 1,612 for weekly screening). But across all three epidemic severity scenarios, frequency  
197 of testing has an even more powerful impact on cumulative infections than the sensitivity  
198 of the test employed (**Figure 1**).

199

### 200 **Isolation Dormitory Occupancy**

201 In the base case ( $R_t = 2.5$  and 5 exogenous infections each week), daily screening with a  
202 70% sensitive, 98% specific test results in an average isolation dormitory census of 108  
203 occupants, of whom 12% are truly infected (**Figure 2a**). With the frequency of screening  
204 reduced to once every 2 (3) days, overall census falls to 66 (59), as fewer tests are

205 performed and fewer false positives are obtained; however, less frequent testing also  
206 results in greater transmission of infection and the average proportion of truly infected  
207 persons in isolation rises to 27% (46%) (**Figure 2b/2c**). Further reducing the frequency of  
208 screening to weekly causes the infected occupancy of the isolation dormitory to grow  
209 explosively (**Figure 2d**).

210 False positives – and the isolation capacity required to accommodate them – are greatly  
211 reduced using a more specific test. With daily screening in the base case, for example,  
212 increasing the test specificity from 98% to 99.7% causes the average daily census of false  
213 positives in isolation to fall from 96 to 15.

214 Under worst case assumptions ( $R_t = 3.5$  and 25 exogenous infections every two weeks)  
215 average census grows from 127 (26% truly infected) with daily screening to 308 (92%  
216 truly infected) with screening every 3 days (**Figure S2**). With weekly screening, virtually  
217 the entire student population will have been infected before the 80-day semester is  
218 concluded.

219 In the best case ( $R_t = 1.5$ , no exogenous shocks, and a 99.7% specific test), average  
220 occupancy of the isolation dormitory is light (5 infected, 2 false positives) and can be  
221 controlled with no more than weekly screening (**Figure S3**).

222

223

## 224 **Cost-effectiveness and budget impact**

225 In the base case, screening with a less expensive, less sensitive test dominates (i.e., costs  
226 less and averts greater numbers of infection) screening with more expensive, more  
227 accurate tests for all plausible WTP values. At the benchmark maximum WTP  
228 (\$10,500/infection averted in the base case), screening every 2 days with a 70% sensitive  
229 test is the preferred strategy. If WTP exceeds \$46,400 per infection averted, daily  
230 screening with this same test is preferred (**Table 2**). Under worst-case assumptions, daily  
231 screening strategies are the only undominated choices for all WTP values exceeding  
232 \$6,600/infection averted; at the benchmark maximum WTP (\$13,500/infection averted in  
233 the worst case), daily screening with the least sensitive (70%) test is the preferred choice.  
234 Under best-case assumptions (WTP maximum \$7,500 per infection averted), weekly  
235 screening with a 70% sensitive test is preferred.

236 Over the 80-day semester, the per-student costs of implementing the preferred screening  
237 strategy will be \$120, \$470, and \$920 in the best, base, and worst case scenarios,  
238 respectively (**Table 3**).

239

## 240 **DISCUSSION**

241

242 The safe return of students to residential colleges demands an effective SARS-CoV-2 monitoring  
243 strategy. We find that a highly specific screening test that can easily be administered to each  
244 student every one to seven days – and that reports results quickly enough to permit newly

245 detected cases to be isolated within hours – will be sufficient to blunt the further transmission of  
246 infection and control outbreaks at a justifiable cost.

247

248 Of the many uncertain variables driving our assessment of the required frequency of screening,  
249 we highlight the effective reproductive number,  $R_t$ . This uncertain measure of the transmission  
250 potential of infection will depend in part on factors that are within the control of students and  
251 university administrators. Strict adherence to hand-washing, mask-wearing, public space  
252 occupancy limits, and other best practices could drive  $R_t$  down to best-case levels, rendering  
253 containment controllable with testing as infrequent as weekly. However, any relaxation of these  
254 measures in the residential college setting could easily drive  $R_t$  to worst-case levels, requiring  
255 screening as frequent as daily. All members of the university community must understand the  
256 fragility of the situation and the ease with which inattention to behavior may propagate infections  
257 and precipitate the need once again to shut down campus.

258

259 Much depends on the judicious management of positive test results, both true and false. Rapid  
260 detection, confirmation, isolation, and treatment of true positives is, of course, essential. We find  
261 that frequent screening with a test of modest sensitivity and a turnaround time to results of 8  
262 hours will be sufficient for this purpose. The greater difficulty lies in managing the  
263 overwhelming number of false positives that will inevitably result from repeated screening for  
264 low-prevalence conditions. False positive results threaten to overwhelm isolation housing  
265 capacity, a danger whose gravity increases with screening frequency. The specificity of the  
266 initial screen will matter far more than its sensitivity.

267

268 Even with a 98% specific screening test, false positives will present a challenge. Until a  
269 confirmatory test result is obtained, anyone receiving a positive test result will be presumed to be  
270 infectious and needing to be separated from other students. Setting aside the logistical challenges  
271 and financial costs, administrators must anticipate the anxiety such separations may provoke  
272 among both students and their families. Excessive numbers of false positives may fuel panic and  
273 undermine confidence in the reliability of the monitoring program. It may be possible to work  
274 with test manufacturers to tune test kits for use in this setting, sacrificing some small measure of  
275 sensitivity in favor of higher specificity.

276

277 Obtaining an adequate supply of testing equipment will be a challenge. On a college campus of  
278 5,000 enrollees, screening of the students alone every two days will require roughly 195,000 test  
279 kits over the abbreviated semester. Our analysis assumed per test costs (including the test  
280 equipment and associated personnel costs) ranging from \$10-\$50. Lower-cost, self-administered  
281 testing modalities may soon be available and could make screening more affordable. Pooling  
282 could also facilitate more efficient, higher volume screening.<sup>22</sup> However, pooling introduces its  
283 own logistical challenges and could increase the time to definitively identify and isolate a  
284 positive case, resulting in further transmission and provoking anxiety among the many  
285 uninfected students notified that they are among the members of an initially positive pool.

286

287 We have tried to help decision makers make sense of the “value” question by conducting a cost-  
288 effectiveness analysis and by comparing our findings to a rough estimate of the societal

289 willingness to pay per infection averted.<sup>23</sup> While we have adhered to the broad outlines of  
290 recommended practice for the conduct of economic evaluation,<sup>23</sup> we urge readers to interpret our  
291 results with caution. The majority of our assumptions are conservative – that is, they understate  
292 the value of more frequent testing. For example, we ignore the clinical harms and attributable  
293 costs of COVID-19-related morbidity and treatment. We also ignore the value of infections  
294 averted beyond the student population. However, a few assumptions (e.g., our failure to account  
295 for the economic and quality of life effects of false positives) may pull in the direction of less  
296 testing.

297

298 The simple model underlying this analysis has notable limitations. We assumed homogenous  
299 mixing without age-dependent transmission. We did not explicitly include the impact of  
300 screening on faculty and staff, though we did allow for the importation of infections from  
301 exterior sources. We assumed that no students arrive on campus with immunity to COVID-19.  
302 Finally, we excluded the impact of symptom screening and contact tracing. Given that both are  
303 logistically challenging, this is a noteworthy omission; our results suggest that with frequent  
304 enough screening, neither symptom checking nor contact tracing would be necessary for  
305 epidemic control.

306

307 Reopening college imposes risks that extend beyond students to the faculty who teach them, to  
308 the many university employees (administrative staff, dining hall workers, custodians) who come  
309 into close daily contact with them, and to the countless other members of the surrounding  
310 community with whom they come into contact. University presidents have a duty to consider the



311 downstream impact of their reopening decisions on these constituencies. However, their first  
312 responsibility is to the safety of the students in their care. So, while we certainly do not intend to  
313 minimize the broader effects of the reopening decision, we have quite deliberately excluded from  
314 consideration any transmissions exported off campus.

315

316 We believe there is a safe way for students to return to college in the Fall of 2020; the question is  
317 whether it is feasible today on a large scale. Coupled with strict behavioral interventions that  
318 keep  $R_t$  below 2.5, a rapid, inexpensive and even poorly sensitive (>70%) test, conducted at least  
319 every 2 days, would produce a modest number of containable infections and would be cost-  
320 effective.

321 **REFERENCES**

- 322 1. Centers for Disease Control and Prevention. Interim guidance for administrators of us  
323 institutions of higher education: plan, prepare, and respond to Coronavirus Disease  
324 2019 ([https://www.cdc.gov/coronavirus/2019-ncov/community/guidance-ihe-  
325 response.html](https://www.cdc.gov/coronavirus/2019-ncov/community/guidance-ihe-response.html)).
- 326 2. Hubler, S. College calendars in the pandemic: no fall break and home by  
327 Thanksgiving. New York Times. May 19, 2020  
328 (<https://www.nytimes.com/2020/05/19/us/coronavirus-college-fall-semester.html>).
- 329 3. National Governors Association. Memorandum: reopening institutions of higher  
330 education. May 27, 2020 ([http://www.nga.org/wp-content/uploads/2020/05/State-  
331 Higher-Ed-reopening-final.pdf](http://www.nga.org/wp-content/uploads/2020/05/State-Higher-Ed-reopening-final.pdf)).
- 332 4. U.S. Food and Drug Administration. Coronavirus (COVID-19) update: daily  
333 roundup. May 21, 2020 ([https://www.fda.gov/news-events/press-  
334 announcements/coronavirus-covid-19-update-daily-roundup-may-21-2020](https://www.fda.gov/news-events/press-announcements/coronavirus-covid-19-update-daily-roundup-may-21-2020)).
- 335 5. U.S. Food and Drug Administration. Coronavirus Disease 2019 (COVID-19)  
336 emergency use authorizations for medical devices. ([https://www.fda.gov/medical-  
337 devices/emergency-situations-medical-devices/emergency-use-  
338 authorizations#coronavirus2019](https://www.fda.gov/medical-devices/emergency-situations-medical-devices/emergency-use-authorizations#coronavirus2019))
- 339 6. Walensky RP, del Rio C. From mitigation to containment of the COVID-19  
340 pandemic: putting the SARS-CoV-2 genie back in the bottle. *JAMA* 2020;  
341 323(19):1889–1890.

- 342 7. McLaughlin, K. The coronavirus could force smaller liberal arts and state colleges to  
343 close forever. Insider. April 26, 2020 ([https://www.insider.com/smaller-colleges-  
may-never-reopen-because-of-the-coronavirus-2020-4](https://www.insider.com/smaller-colleges-<br/>344 may-never-reopen-because-of-the-coronavirus-2020-4)).
- 345 8. Centers for Disease Control and Prevention and the Office of the Assistant Secretary  
346 for Preparedness and Response. COVID-19 pandemic planning scenarios. May 20,  
347 2020 (<https://www.cdc.gov/coronavirus/2019-ncov/hcp/planning-scenarios.html>).
- 348 9. Lauer SA, Grantz KH, Bi Q, et al. The incubation period of Coronavirus Disease  
349 2019 (COVID-19) from publicly reported confirmed cases: estimation and  
350 application. *Ann Intern Med* 2020;172(9):577-582
- 351 10. Centers for Disease Control and Prevention. Quarantine and Isolation. May 6, 2020  
352 ([https://www.cdc.gov/coronavirus/2019-ncov/if-you-are-sick/quarantine-  
isolation.html](https://www.cdc.gov/coronavirus/2019-ncov/if-you-are-sick/quarantine-<br/>353 isolation.html)).
- 354 11. Day M. COVID-19: four fifths of cases are asymptomatic, China figures indicate.  
355 *BMJ* 2020;369:m1375.
- 356 12. Yang R, Gui X, Xiong Y. Comparison of clinical characteristics of patients with  
357 asymptomatic vs symptomatic Coronavirus Disease 2019 in Wuhan, China. *JAMA  
358 Netw Open* 2020;3(5):e2010182.
- 359 13. Ing AJ, Cocks C, Green JP. COVID-19: in the footsteps of Ernest Shackleton. *Thorax*  
360 2020 May 27 (Epub ahead of print).
- 361 14. Pitzer VE, Chitwood M, Havumaki J, et al. The impact of changes in diagnostic  
362 testing practices on estimates of COVID-19 transmission in the United  
363 States. *medRxiv* 2020. doi: <https://doi.org/10.1101/2020.04.20.20073338>

- 364 15. Li Q, Guan X, Wu P, et al. Early transmission dynamics in Wuhan, China, of novel  
365 coronavirus–infected pneumonia. *N Engl J Med* 2020; 382:1199-1207.
- 366 16. Lieberman JA, Pepper G, Naccache SN, et al. Comparison of commercially available  
367 and laboratory developed assays for in vitro detection of SARS-CoV-2 in clinical  
368 laboratories. *J Clin Microbiol* 2020. <https://doi.org/10.1128/JCM.00821-20>
- 369 17. Zhen W, Manji R, Smith E, et al. Comparison of four molecular in vitro diagnostic  
370 assays for the detection of SARS-CoV-2 in nasopharyngeal specimens. *J Clin*  
371 *Microbiol* 2020. <https://doi.org/10.1128/JCM.00743-20>
- 372 18. U.S. News and World Report. 10 colleges with the most undergraduates. October 1,  
373 2019 ([https://www.usnews.com/education/best-colleges/the-short-list-](https://www.usnews.com/education/best-colleges/the-short-list-college/articles/colleges-with-the-most-undergraduates)  
374 [college/articles/colleges-with-the-most-undergraduates](https://www.usnews.com/education/best-colleges/the-short-list-college/articles/colleges-with-the-most-undergraduates)).
- 375 19. National Center for Education Statistics. Characteristics of postsecondary students.  
376 April 2020 ([https://nces.ed.gov/programs/coe/indicator\\_csb.asp](https://nces.ed.gov/programs/coe/indicator_csb.asp)).
- 377 20. U.S. Department of Health and Human Services. United States Life Tables, 2016.  
378 May 7, 2019 ([https://www.cdc.gov/nchs/data/nvsr/nvsr68/nvsr68\\_04-508.pdf](https://www.cdc.gov/nchs/data/nvsr/nvsr68/nvsr68_04-508.pdf)).
- 379 21. Neumann PJ, Cohen JT, Weinstein MC. Updating cost-effectiveness — the curious  
380 resilience of the \$50,000-per-QALY threshold. *N Engl J Med* 2014; 371:796-797.
- 381 22. Hogan CA, Sahoo MK, Pinsky BA. Sample pooling as a strategy to detect community  
382 transmission of SARS-CoV-2. *JAMA* 2020;323(19):1967–1969.
- 383 23. Sanders GD, Neumann PJ, Basu A, et al. Recommendations for conduct,  
384 methodological practices, and reporting of cost-effectiveness analyses: second panel  
385 on cost-effectiveness in health and medicine. *JAMA* 2016;316(10):1093-1103.

**Table 1.** Model input parameters and scenarios.

| <b>Model inputs</b>                                         |                                    |             |              |            | <b>References</b> |
|-------------------------------------------------------------|------------------------------------|-------------|--------------|------------|-------------------|
| <b>Compartments</b>                                         | <b>Initial population size (n)</b> |             |              |            |                   |
| Non-infected, susceptible                                   | 4,990                              |             |              |            | 18                |
| Infected, asymptomatic                                      | 10                                 |             |              |            | Assumption        |
| All other compartments                                      | 0                                  |             |              |            | Assumption        |
| <b>Time horizon (days)</b>                                  |                                    |             |              |            |                   |
|                                                             | 80                                 |             |              |            | 2                 |
| <b>Disease dynamics</b>                                     |                                    |             |              |            |                   |
| Time to recovery ( $1/\rho$ )                               | 14 days                            |             |              |            | 9,10              |
| Time to false positive return ( $1/\mu$ )                   | 1 day                              |             |              |            | Assumption        |
| Probability of symptoms given infection (%)                 | 30                                 |             |              |            | 11-13             |
| Symptomatic case fatality ratio (%)                         | 0.05                               |             |              |            | 8                 |
| Transmission rate ( $\beta$ )                               | Dependent on $R_t$                 |             |              |            |                   |
| Rate of symptoms development ( $\sigma$ )                   |                                    |             |              |            |                   |
| <b>Scenarios</b>                                            |                                    |             |              |            |                   |
|                                                             | <b>Best</b>                        | <b>Base</b> | <b>Worst</b> |            |                   |
| Effective reproductive number, $R_t$                        | 1.5                                | 2.5         | 3.5          | 8,14,15    |                   |
| Test specificity (true negative rate, %)                    | 99.7                               | 98.0        | 98.0         | 16,17      |                   |
| Exogenous shock events (number of infections/time interval) | 0                                  | 5/week      | 25/14 days   | Assumption |                   |
| <b>Test characteristics</b>                                 |                                    |             |              |            |                   |
|                                                             | <b>I</b>                           | <b>II</b>   | <b>III</b>   |            |                   |
| Sensitivity (true positive rate, %)                         | 70                                 | 80          | 90           | Assumption |                   |
| Cost per test (\$)                                          | 10                                 | 20          | 50           | Assumption |                   |
| Time to test result return (hours)                          | 8                                  |             |              |            | Assumption        |
| Confirmatory test sensitivity (%)                           | 100                                |             |              |            | Assumption        |
| Confirmatory test cost (\$)                                 | 100                                |             |              |            | Assumption        |

**Table 2:** Results of the incremental cost-effectiveness analysis (\$/COVID-19 infection averted) in the base (top), worst (middle) and best (bottom) case scenarios. Preferred strategies at the maximum willingness-to-pay (WTP) threshold are shaded gray.

| Frequency                                                                                      | Test Sensitivity (%) | Cost (\$)  | Total Infections | Incremental Cost-effectiveness Ratio (\$/infection averted)* |
|------------------------------------------------------------------------------------------------|----------------------|------------|------------------|--------------------------------------------------------------|
| <b>Base Case Scenario (<math>R_t</math> 2.5, 5 exogenous shock infections each week)</b>       |                      |            |                  |                                                              |
| <b>Maximum willingness-to-pay = \$10,500/infection averted</b>                                 |                      |            |                  |                                                              |
| Weekly                                                                                         | 70                   | 718,700    | 3,662            | ( - )                                                        |
| Weekly                                                                                         | 80                   | 1,210,700  | 2,525            | dominated                                                    |
| Every 3 days                                                                                   | 70                   | 1,567,600  | 234              | 200                                                          |
| Every 2 days                                                                                   | 70                   | 2,350,300  | 135              | 7,900                                                        |
| Weekly                                                                                         | 90                   | 2,776,700  | 1,612            | dominated                                                    |
| Every 3 days                                                                                   | 80                   | 2,870,000  | 187              | dominated                                                    |
| Every 2 days                                                                                   | 80                   | 4,306,700  | 120              | dominated                                                    |
| Daily                                                                                          | 70                   | 4,664,300  | 85               | 46,400                                                       |
| Every 3 days                                                                                   | 90                   | 6,781,400  | 160              | dominated                                                    |
| Daily                                                                                          | 80                   | 8,550,800  | 81               | 852,300                                                      |
| Every 2 days                                                                                   | 90                   | 10,177,700 | 109              | dominated                                                    |
| Daily                                                                                          | 90                   | 20,211,100 | 77               | 3,480,900                                                    |
| <b>Worst Case Scenario (<math>R_t</math> 3.5, 25 exogenous shock infections every 2 weeks)</b> |                      |            |                  |                                                              |
| <b>Maximum willingness-to-pay = \$13,500/infection averted</b>                                 |                      |            |                  |                                                              |
| Weekly                                                                                         | 70                   | 548,200    | 4,991            | ( - )                                                        |
| Weekly                                                                                         | 80                   | 842,100    | 4,992            | dominated                                                    |
| Every 3 days                                                                                   | 70                   | 1,490,400  | 3,052            | dominated                                                    |
| Weekly                                                                                         | 90                   | 1,714,600  | 4,990            | dominated                                                    |
| Every 2 days                                                                                   | 70                   | 2,297,000  | 584              | 400                                                          |
| Every 3 days                                                                                   | 80                   | 2,701,400  | 1,545            | dominated                                                    |
| Every 2 days                                                                                   | 80                   | 4,212,900  | 442              | dominated                                                    |
| Daily                                                                                          | 70                   | 4,613,200  | 233              | 6,600                                                        |
| Every 3 days                                                                                   | 90                   | 6,443,300  | 929              | dominated                                                    |
| Daily                                                                                          | 80                   | 8,456,600  | 213              | 194,800                                                      |
| Every 2 days                                                                                   | 90                   | 9,969,000  | 366              | dominated                                                    |
| Daily                                                                                          | 90                   | 19,990,000 | 199              | 845,900                                                      |

\*Dominated strategies are those that cost more and result in more infections than some combination of other strategies.

**Table 2, continued:** Results of the incremental cost-effectiveness analysis (\$/COVID-19 infection averted) in the base (top), worst (middle) and best (bottom) case scenarios. Preferred strategies at the maximum willingness-to-pay (WTP) threshold are shaded gray.

| Frequency                                                                                  | Test Sensitivity (%) | Cost (\$)  | Total Infections | Incremental Cost effectiveness Ratio (\$/infection averted)* |
|--------------------------------------------------------------------------------------------|----------------------|------------|------------------|--------------------------------------------------------------|
| <b>Best Case Scenario (<math>R_t</math> 1.5, no exogenous shocks, 99.7% specific test)</b> |                      |            |                  |                                                              |
| <b>Maximum willingness-to-pay &lt;\$7,500/infection averted</b>                            |                      |            |                  |                                                              |
| <b>Do Nothing</b>                                                                          | -                    | 0          | 1,371            | (-)                                                          |
| <b>Weekly</b>                                                                              | 70                   | 586,600    | 31               | 400                                                          |
| <b>Weekly</b>                                                                              | 80                   | 1,154,800  | 24               | dominated                                                    |
| <b>Every 3 days</b>                                                                        | 70                   | 1,368,400  | 8                | 35,200                                                       |
| <b>Every 2 days</b>                                                                        | 70                   | 2,051,900  | 5                | 209,200                                                      |
| <b>Every 3 days</b>                                                                        | 80                   | 2,696,400  | 7                | dominated                                                    |
| <b>Weekly</b>                                                                              | 90                   | 2,860,300  | 20               | dominated                                                    |
| <b>Every 2 days</b>                                                                        | 80                   | 4,043,700  | 4                | dominated                                                    |
| <b>Daily</b>                                                                               | 70                   | 4,098,500  | 2                | 742,600                                                      |
| <b>Every 3 days</b>                                                                        | 90                   | 6,680,500  | 6                | dominated                                                    |
| <b>Daily</b>                                                                               | 80                   | 8,077,500  | 2                | dominated                                                    |
| <b>Every 2 days</b>                                                                        | 90                   | 10,019,100 | 4                | dominated                                                    |
| <b>Daily</b>                                                                               | 90                   | 20,014,700 | 2                | dominated                                                    |

\*Dominated strategies are those that cost more and result in more infections than the next least costly strategy.

**Table 3:** Per student costs for optimal policies over an 80-day horizon under base, worst , and best case scenarios

| <b>Scenario</b>                            | <b>Optimal Policy</b>                   | <b>Cost per Student (\$)</b> |
|--------------------------------------------|-----------------------------------------|------------------------------|
| <b>Base case (<math>R_t = 2.5</math>)</b>  | Screening every 2 days, 70% sensitivity | 470                          |
| <b>Worst case (<math>R_t = 3.5</math>)</b> | Daily screening, 70% sensitivity        | 920                          |
| <b>Best case (<math>R_t = 1.5</math>)</b>  | Weekly screening, 70% sensitivity       | 120                          |



**Figure 1. Cumulative infections as a function of test sensitivity and frequency.** Over an 80-day horizon, for the **(a)** base case ( $R_t$  2.5), **(b)** worst case ( $R_t$  3.5), and **(c)** best case ( $R_t$  1.5), these figures report cumulative infections (vertical axis; logarithmic scale) for tests with sensitivity ranging from 70-99% (horizontal axis). The colored lines denote different screening test frequencies (blue: daily screens; orange: every 2 day screen; gray: every 3 day screen; yellow: weekly screen).

**Figure 1. Cumulative infections as a function of test sensitivity and frequency**

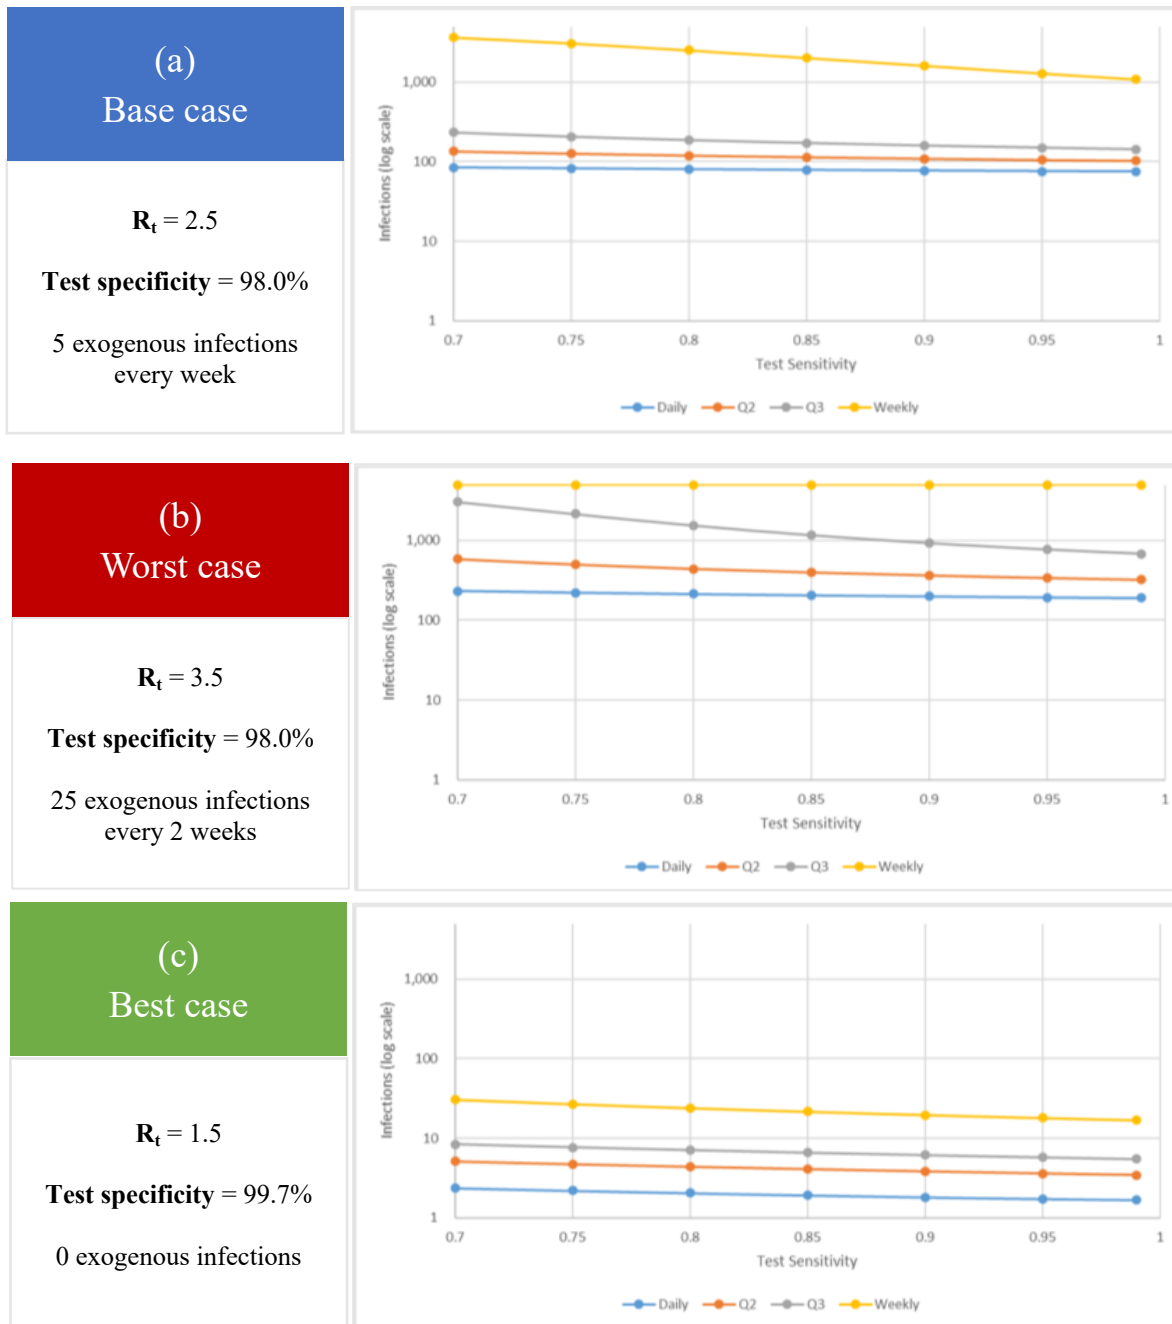

**Figure 2: Projecting the required size of the isolation dormitory.** An isolation dormitory needs to be large enough to house students with false positive results (shaded gray), students with symptoms (shaded light blue), and students without symptoms who have received true positive results (shaded dark blue). Over the 80-day horizon (time on the horizontal axis), this figure depicts the number of students in the isolation dormitory (vertical axis, note the scales are different) by indication, using a 70% sensitive, 98% specific test, under the base case scenario ( $R_t = 2.5$ ). The panels show results of screening at different frequencies: **(a)** daily screening; **(b)** screening every 2 days; **(c)** screening every 3 days; and **(d)** weekly screening. In **Panels a through c**, the effect of exogenous shocks (5 per week) is visible in the scalloped borders; this is less evident with weekly testing where the number of true positive cases masks the comparatively small impact of exogenous shocks.

**Figure 2: Expected daily occupancy of the isolation dormitory under base case assumptions.**

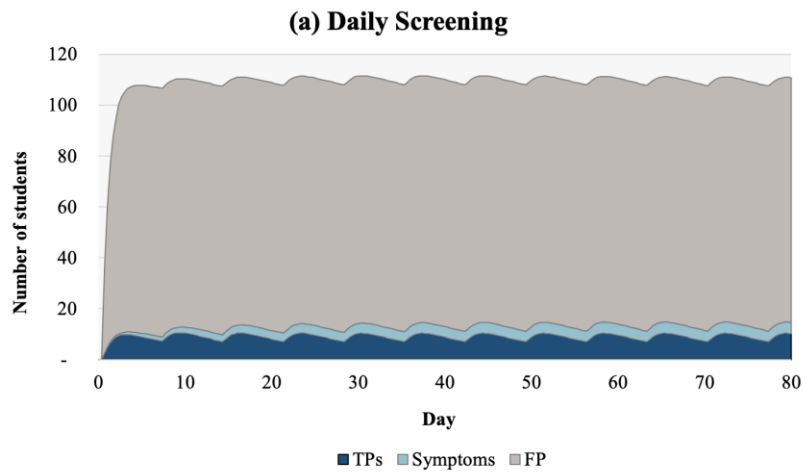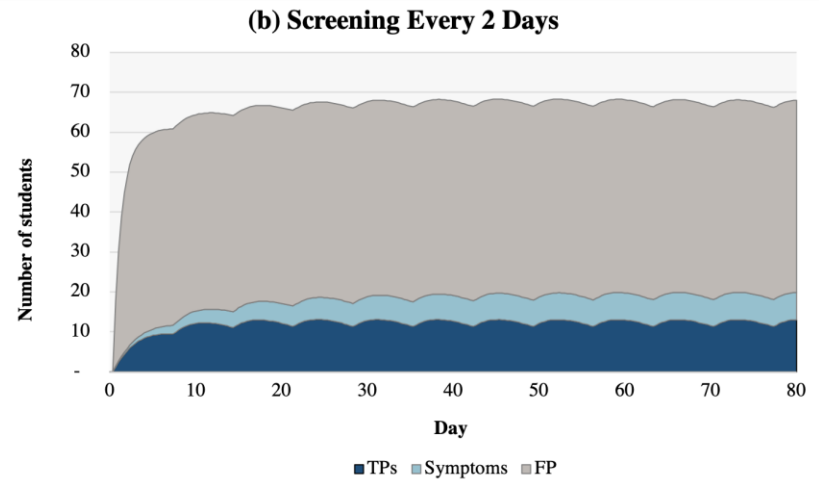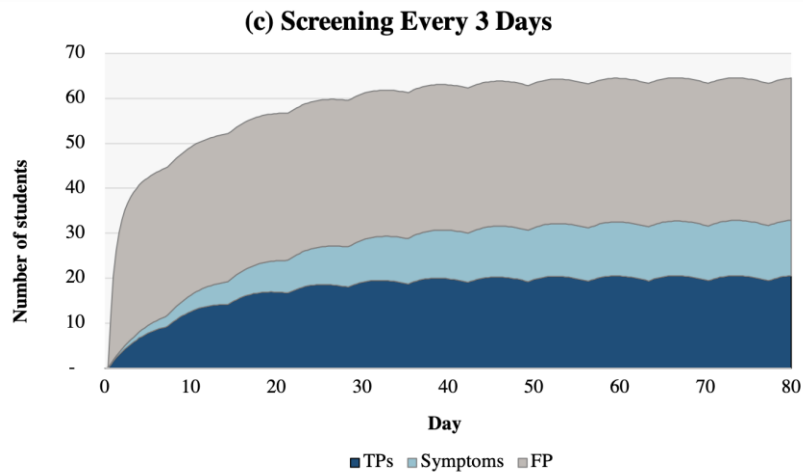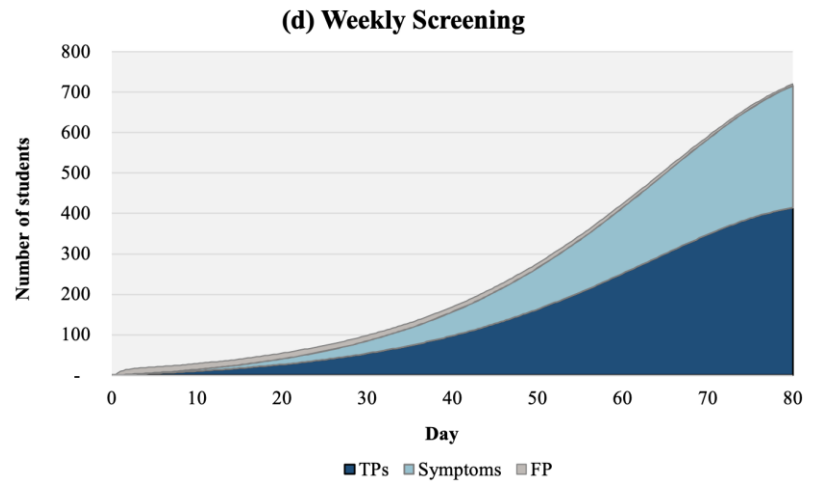

## **Supplementary Appendix:**

### **Testing for COVID-19 in higher education:**

#### **What testing do we need to open college campuses?**

A. David Paltiel, MBA, PhD

Amy Zheng, BA

Rochelle P. Walensky, MD, MPH

## Table of Contents

|                                                                                                                                          |   |
|------------------------------------------------------------------------------------------------------------------------------------------|---|
| <b>Description of model</b>                                                                                                              | 3 |
| <b>Figure S1.</b> Model schematic and input parameters                                                                                   | 6 |
| <b>Figure S2.</b> Effect of testing frequency on occupancy and infection status of the isolation dormitory under the worst case scenario | 7 |
| <b>Figure S3.</b> Effect of weekly testing on occupancy and infection status of the isolation dormitory under the best case scenario     | 8 |

## Model description

We developed a dynamic, compartmental model using a modified “susceptible-infected-recovered” (or SIR) framework. The model portrays the epidemiology and natural history of infection in a homogeneous population of at-risk individuals as a sequence of transitions, governed by difference equations, between different health states (or “compartments”). The flow diagram (**Figure S1**, below) illustrates the modifications we made to the basic SIR framework:

- Addition of regular, repeated screening with a test of imperfect sensitivity and specificity.
- Removal of infected individuals from the transmitting population based on either screening test findings or the development of COVID-defining symptoms.
- Removal (and return) of uninfected individuals from the transmitting population based on “false positive” screening test findings.
- Importation of additional new infections from exogenous sources (e.g., infections transmitted to students by university employees or members of the surrounding community).

**Compartments.** We defined a total of 7 model compartments, divided into three pools:

- Active transmission and testing pool. Everyone is in this pool at time 0. All transmission of infection takes place between individuals in this pool. This is also the pool in which screening for infection takes place.
  - U: Uninfected, susceptible individuals
  - A: Infected, asymptomatic

Note that, without testing, individuals in these two compartments are indistinguishable from one another.

- Isolation pool. Individuals in this pool are assumed to be isolated from the active transmission pool and from one another. It is assumed that transmission is not possible within this pool.
  - S: Infected, symptomatic (true) positive test result
  - TP: Infected, asymptomatic, (true) positive test result
  - FP: Uninfected, false positive result
- Removed pool. Individuals in this pool are assumed to play no role either in the transmission of infection or in testing activities.
  - R: Recovered
  - D: Dead

## Parameters

$\beta$ : rate at which infected individuals contact susceptibles and infect them

$\tau$ : rate at which individuals in the testing pool are screened for infection

$\delta$ : rate at which individuals in the symptomatic compartment die

$\rho$ : rate at which infected individuals recover from disease and are removed

$\sigma$ : rate of symptom onset for infected individuals

$\mu$ : rate at which false positives are returned to the Uninfected compartment

Se: sensitivity of the screening test

Sp: specificity of the screening test

I(t): an indicator function which assumes value 1 if an exogenous shock takes place in cycle t; 0 otherwise

X: number of imported infections in a given exogenous shock

The model uses a cycle time of 8 hours. All rates are calculated per 8-hour cycle.

## Governing equations

- Uninfected (t+1) = Uninfected (t) – New Infections – New FPs + Returning FPs – Exogenous Shocks

$$U(t + 1) = U(t) \cdot \left[ 1 - \beta \frac{A(t)}{U(t) + A(t)} \right] - U(t-1) \cdot \tau \cdot (1 - Sp) + \mu FP(t) - X \cdot I(t + 1)$$

- Asymptomatic (t+1) = Asymptomatic (t) – symptoms - recoveries + New Infections – TPs + Exogenous Shocks

$$A(t + 1) = A(t) \cdot \left[ 1 - \sigma - \rho + \beta \frac{U(t)}{U(t) + A(t)} \right] - A(t-1) \cdot \tau \cdot Se + X \cdot I(t + 1)$$

- False Positives (t+1) = False Positives (t) – Returning FP + New FPs

$$FP(t + 1) = FP(t) \cdot [1 - \mu] + U(t-1) \cdot \tau \cdot (1 - Sp)$$

- True Positives (t+1) = True Positives (t) – Symptoms – Recovery + New TPs

$$TP(t + 1) = TP(t) \cdot [1 - \sigma - \rho] + A(t-1) \cdot \tau \cdot Se$$



- Symptomatic (t+1) = Symptomatic (t) – Recovery – Mortality + New Symptoms

$$S(t + 1) = S(t) \cdot [1 - \rho - \delta] + \sigma [TP(t) + A(t)]$$

- Recovered (t+1) = Recovered (t) + New Recoveries

$$R(t + 1) = R(t) + \rho [TP(t) + A(t) + S(t)]$$

- Deaths (t+1) = Deaths (t) + New Deaths

$$D(t + 1) = D(t) + \delta S(t)$$

- $N = U + A + S + TP + FP + R + D =$  Total population size (constant)

Note that there is a lag of one cycle between the time that a test is conducted and the time that persons receiving a positive test result are moved to the isolation pool.

### Initial conditions:

$$U(0) = 4,990$$

$$A(0) = 10$$

All other compartments are empty at time 0.

### Estimating Key Rate Parameters

1)  $\sigma$ : rate of symptom onset for infected individuals. We assumed that 30% of all infected individuals would eventually develop symptoms. In the absence of a screening program, this implies that  $\sigma / (\sigma + \rho) = 0.3$ . Assuming a mean recovery time of 14 days and computing all rates per 8-hour cycle yields  $\rho = 1 / (3 * 14 \text{ days})$  and we solve for  $\sigma = 0.0102$ .

2)  $\beta$ : rate at which infected individuals contact susceptibles and infect them. The effective reproductive number  $R_t = \beta / (\sigma + \rho)$ . We assumed  $R_t = \{1.5, 2.5, 3.5\}$ , which implies  $\beta = \{0.051, 0.085, 0.119\}$ . Recall that all rates are estimated per 8-hour cycle.

3)  $\delta$ : rate at which individuals in the symptomatic compartment die. We assumed that the symptomatic case fatality risk was 0.05%. This implies  $[\sigma / (\sigma + \rho)] * [\delta / (\delta + \rho)] = 0.0005$  and permits us to solve for  $\delta = 0.00004$ .

**Figure S1.** Model schematic and input parameters

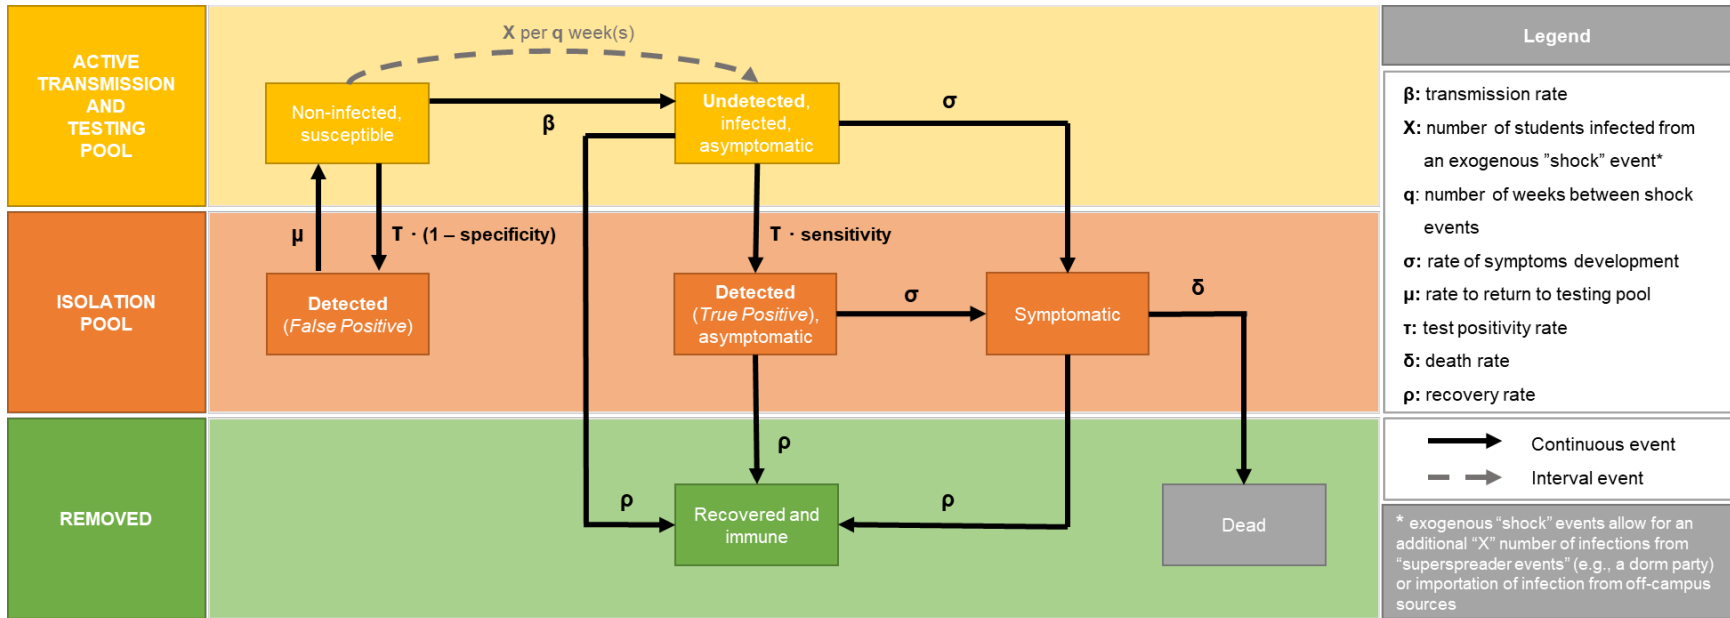

**Figure S2: Expected daily occupancy of the isolation dormitory under worst case assumptions.**

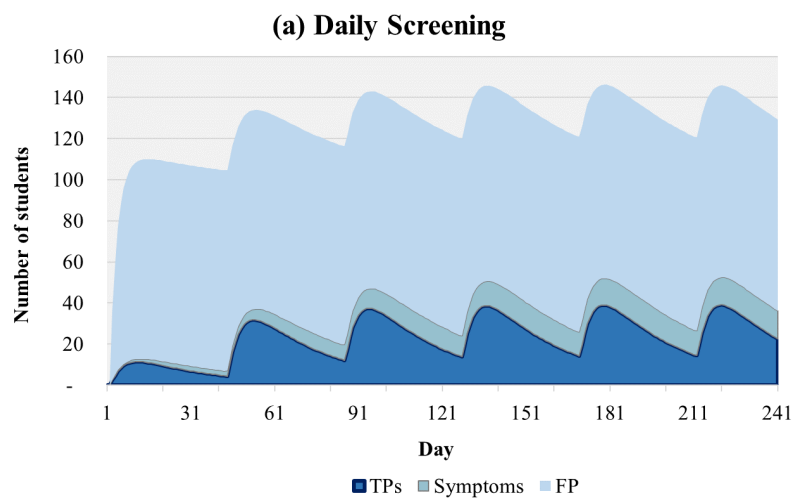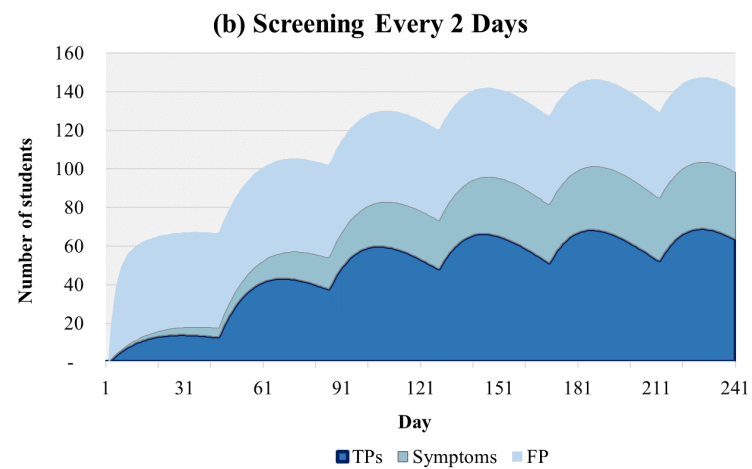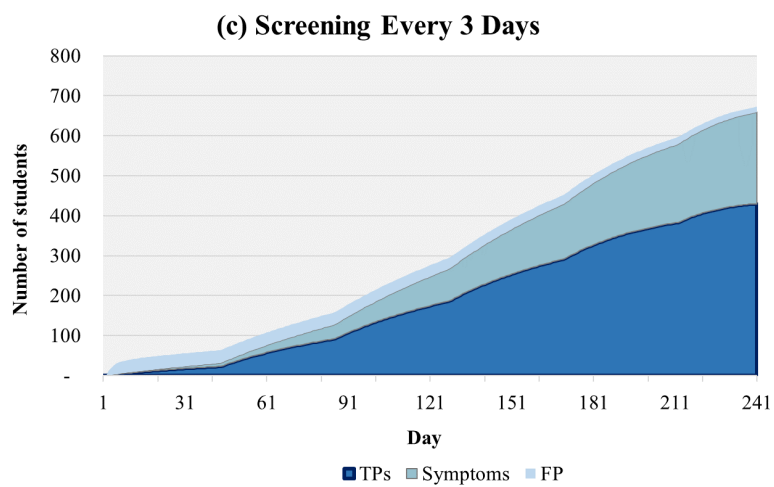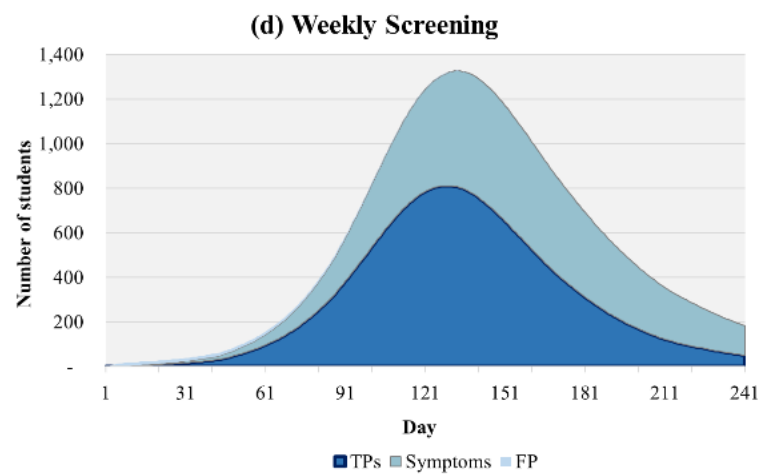

Figure S3: Expected daily occupancy of the isolation dormitory under best case assumptions.

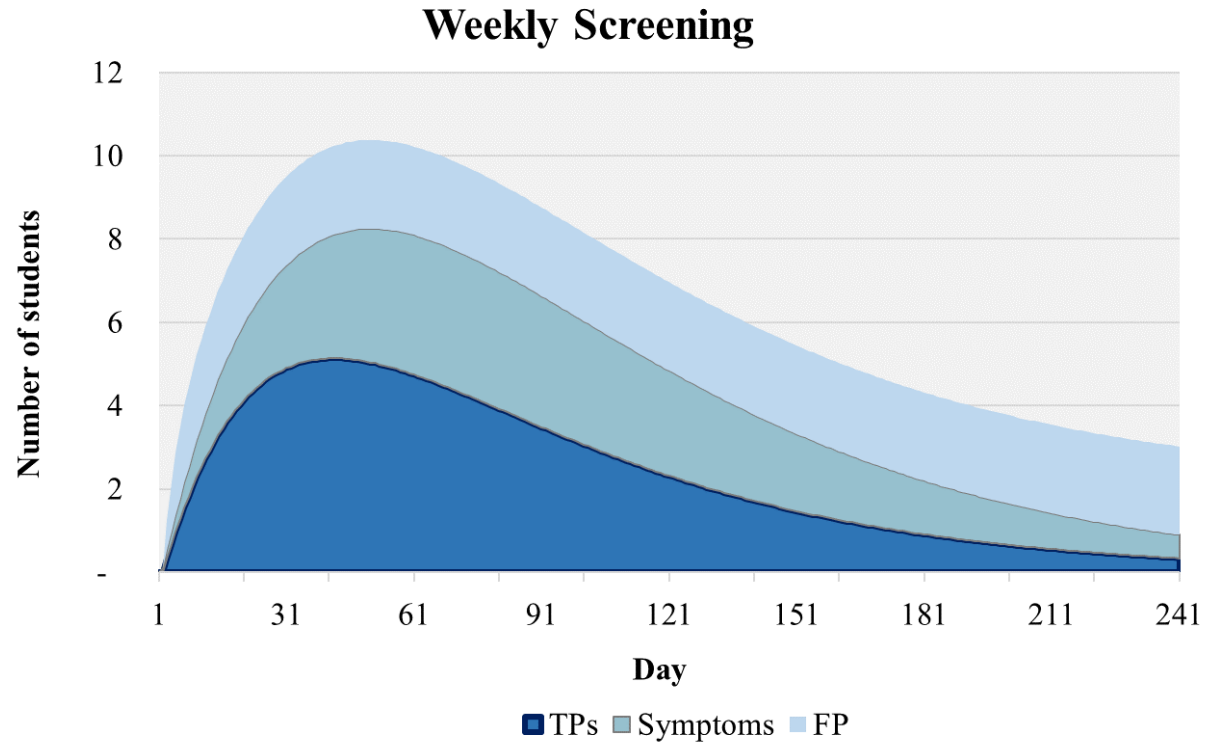

Source: https://www.medrxiv.org/content/10.1101/2020.07.06.20147702v1.full.pdf?fbclid=IwAR0_aJMIqnaHGmMnBJ9zmc9J_sbuirEUwrhq4VU14McKRnjp5mGFEo7y6qI
